# Supplementary material for: Tunable slow photon effect and local surface plasmon in Ag-immobilized TiO2 inverse opal films for enhancing pollutant photodegradation
Source: Royal Society of Chemistry journal article supplement (doi:10.1039/d4ma00807c), 2024-01-01
Supplement: d4ma00807c1.pdf [file d4ma00807c1.pdf]

## SUPPORTING INFORMATION

### Tunable slow photon effect and local surface plasmon in Ag-immobilized TiO<sub>2</sub> inverse opal films for enhancing pollutant photodegradation

Thi Kim Ngan Nguyen<sup>a,\*</sup>, Fabien Grasset<sup>b</sup>, Satoshi Ishii<sup>c</sup>, Hiroshi Fudouzi<sup>d</sup>, Tetsuo Uchikoshi<sup>b,d</sup>

<sup>a</sup>International Center for Young Scientists, Global Networking Division, National Institute for Materials Science, 1-2-1 Sengen, Tsukuba, Ibaraki 305-0044, Japan

<sup>b</sup>CNRS–Saint-Gobain–NIMS, IRL3629, Laboratory for Innovative Key Materials and Structures, National Institute for Materials Science, 1-1 Namiki, Tsukuba, Ibaraki 305-0044, Japan

<sup>c</sup>Research Center for Materials Nanoarchitectonics (MANA), National Institute for Materials Science, 1-1 Namiki, Tsukuba, Ibaraki 305-0044, Japan

<sup>d</sup>Research Center for Electronic and Optical Materials, National Institute for Materials Science, 1-2-1 Sengen, Tsukuba, Ibaraki 305-0044, Japan

\*Corresponding author: Thi Kim Ngan NGUYEN

Full postal address: International Center for Young Scientists, National Institute for Materials Science (NIMS), 1-2-1 Sengen, Tsukuba, Ibaraki 305-0047, Japan

E-Mail address: NGUYEN.Thikimngan@nims.go.jp

TABLES

Table S1. The calculation of stop band peak, fraction of air, and TiO<sub>2</sub> in inverse opal structure by using Bragg's law equation.

| Sample                | D (nm) | Testing<br>$\lambda_{\max}$ (nm) | $f_{\text{air}}$ | $f_{\text{water}}$ | $f_{\text{TiO}_2}$ |
|-----------------------|--------|----------------------------------|------------------|--------------------|--------------------|
| Opal                  | 316    | 734                              | 0.36             |                    |                    |
| IO (air)              | 250    | 474                              | 0.94             |                    | 0.06               |
| <i>IO (water) 90°</i> | 250    | 460                              |                  | 0.94               |                    |
| <i>IO (water) 5°</i>  |        | 438                              |                  | 0.94               |                    |
| Opal                  | 338    | 818                              | 0.30             |                    |                    |
| IO (air)              | 288    | 568                              | 0.92             |                    | 0.08               |
| <i>IO (water) 90°</i> | 288    | 530                              |                  | 0.92               |                    |
| <i>IO (water) 5°</i>  |        | 504                              |                  | 0.92               |                    |
| Opal                  | 387    | 921                              | 0.34             |                    |                    |
| IO (air)              | 318    | 613                              | 0.93             |                    | 0.07               |
| <i>IO (water) 90°</i> | 318    | 585                              |                  | 0.93               |                    |
| <i>IO (water) 5°</i>  |        | 556                              |                  | 0.93               |                    |

Table. S2 The optical absorbance and indirect band gap of the disorder inverse opal TiO<sub>2</sub> introduced silver composites.

| Samples                | Absorbance<br>peak<br>(nm) | Absorbance<br>range<br>(nm) | Optical Eg<br>(eV) |
|------------------------|----------------------------|-----------------------------|--------------------|
| TiO <sub>2</sub>       |                            | 330-390                     | 3.17               |
| TiO <sub>2</sub> Ag1   | 450                        | 389-620                     | 2.19               |
| TiO <sub>2</sub> Ag2   | 450                        | 389-620                     | 2.19               |
| TiO <sub>2</sub> Ag3   | 450                        | 392-620                     | 2.19               |
| TiO <sub>2</sub> Ag4   | 450                        | 398-630                     | 2.25               |
| TiO <sub>2</sub> AgNS1 | 477                        | 400-540                     | 2.37               |
| TiO <sub>2</sub> AgNS2 | 465                        | 398-570                     | 2.32               |
| TiO <sub>2</sub> AgNS3 | 455                        | 392-601                     | 2.31               |
| TiO <sub>2</sub> AgNS4 | 442                        | 389-578                     | 2.35               |

Table S3. The Ag and Ti atomic ratios assigned to NS-combined Ag and bare Ag at different positions inside the inverse opal wall were calculated by using STEM-EDX mapping.

| Position* | TiO-AgNS4<br>(at.%Ag)10 <sup>-3</sup> /(at.%Ti) | TiO-Ag4    |
|-----------|-------------------------------------------------|------------|
| 1         | 18.3                                            | 1.9        |
| 2         | 17.6                                            | 5.1        |
| 3         | 17.9                                            | 4.4        |
| 4         | 20.2                                            | 21.0       |
| 5         | 17.4                                            | 18.7       |
| Ave.      | 18.3 ± 0.2                                      | 10.7 ± 1.5 |

Table S4. The atomic percentages of the elements existing in the composite films.

| Films        | C1s   | O1s  | Ti2p  | Ag3d | S2p  | Na1s |
|--------------|-------|------|-------|------|------|------|
|              | % at. |      |       |      |      |      |
| ITO250 Ag4   | 8.5   | 62.1 | 22.41 | 0.23 | 0    | 6.77 |
| ITO250 AgNS4 | 19.4  | 52.8 | 17.20 | 1.41 | 0.66 | 8.59 |

Table S5. XPS binding energy (eV) analysis of TIO250 combined with Ag4 and AgNS4 NPs.

|      |       | TiO                 | TiO-Ag4                                                                        | TiO-AgNS4                                                                 | AgNS4                                                                     |
|------|-------|---------------------|--------------------------------------------------------------------------------|---------------------------------------------------------------------------|---------------------------------------------------------------------------|
|      |       | Binding energy (eV) |                                                                                |                                                                           |                                                                           |
| Ti   | 2p3/2 | 459.4               | 459.4                                                                          | 459.3                                                                     |                                                                           |
|      | 2p1/2 | 465.1               | 465.2                                                                          | 465.1                                                                     |                                                                           |
| O1s  |       |                     | 530.1 (O-);<br>531.8 (S=O);<br>530.7 (Ti-O);<br>532.7 (O-H)                    | 530.1 (O-); 531.8<br>(S=O); 530.7 (Ti-<br>O); 532.7 (O-H)                 | 530 (O-); 532<br>(S=O); 531.2 (O-H)                                       |
| Ag3d | 3d5/2 |                     | 368.2 (Ag);<br>367.6 (Ag <sub>2</sub> O)<br>(Ag:Ag <sub>2</sub> O =<br>0.26:1) | 368.1 (Ag); 367.8<br>(Ag <sub>2</sub> O)<br>Ag:Ag <sub>2</sub> O = 14.5:1 | 368.1 (Ag); 367.8<br>(Ag <sub>2</sub> O)<br>Ag:Ag <sub>2</sub> O = 14.5:1 |
|      | 3d3/2 |                     | 374.2; 373.6                                                                   | 374.1 (Ag); 373.8<br>(Ag <sub>2</sub> O)<br>(AgO/Ag <sub>2</sub> O)       | 374.1 (Ag); 373.8<br>(Ag <sub>2</sub> O)<br>(AgO/Ag <sub>2</sub> O)       |

|     |       |                                             |                                                    |
|-----|-------|---------------------------------------------|----------------------------------------------------|
| S2p | 2p1/2 | 168.6                                       | 168.1 (C-SO3-)                                     |
|     | 2p3/2 | 169.8                                       | 169.3                                              |
| C1s |       | 284.9 (C=C);<br>285.6 C-C); 286.4<br>(C-S); | 283.5; 284.6<br>(C=C); 285.4 (C-C);<br>286.1 (C-S) |

Table. S6. The calculated intensity of the absorbance of the disordered and ordered TiO deposited AgNS4 from Figure 7. The enhanced percentages were calculated by the normalized intensity when the highest peak was recorded at 450 nm.

| Absorbance peak | TiO AgNS4 Powder |                      | TiO288 AgNS4   |                      | TiO318 AgNS4   |                      |
|-----------------|------------------|----------------------|----------------|----------------------|----------------|----------------------|
|                 | Real intensity   | Normalized intensity | Real intensity | Normalized intensity | Real intensity | Normalized intensity |
| 450             | 0.2336           | 1                    | 0.206          | 1                    | 0.17           | 1                    |
| 480             | 0.185            | 0.791952             | 0.178266       | 0.865369             | 0.155          | 0.911765             |
| 510             | 0.1227           | 0.525257             | 0.11177        | 0.542573             | 0.109          | 0.641176             |
| 550             | 0.0259           | 0.110873             | 0.0348         | 0.168932             | 0.0189         | 0.111176             |

Table S7. The photocatalytic rate parameters of the TiO films without or with different Ag NPs.

| Samples      | Photodegradation rate after 1h (%) | Photodegradation Kinetic ( $10^3 \cdot \text{min}^{-1}$ ) | Photodegradation rate after 2h (%) | Photodegradation rate after 4 cycles (%) |
|--------------|------------------------------------|-----------------------------------------------------------|------------------------------------|------------------------------------------|
| TiO250       | 45.9                               | 9.3                                                       |                                    |                                          |
| TiO288       | 44.5                               | 8.7                                                       | 79.5                               | 71.8                                     |
| TiO318       | 40.7                               | 7.8                                                       |                                    |                                          |
| TiO250Ag4    | 60.7                               | 13.2                                                      |                                    |                                          |
| TiO288 Ag4   | 62.8                               | 15.3                                                      | 87.0                               | 87.6                                     |
| TiO318 Ag4   | 63.2                               | 15.7                                                      |                                    |                                          |
| TiO250 AgNS4 | 64.1                               | 15.3                                                      |                                    |                                          |
| TiO288 AgNS4 | 68.4                               | 17.3                                                      | 91.5                               | 91.3                                     |
| TiO318 AgNS4 | 65.8                               | 15.9                                                      |                                    |                                          |

AgNS4

Table S8. The EIS parameter (Rct, Rs, Csc) was calculated from the Niquyst plots and  $\omega_{\max}$  was calculated from the Bode plots. The electron lifetime  $\tau_n$  was calculated in association with the frequency maximum by the equation  $\tau_n = 1/2\pi\omega_{\max}$ .

| Samples      | Rct ( $\Omega$ )     | Csc<br>$\mu\text{F}$ | Rs( $\Omega$ ) | Rct<br>( $\Omega \times 10^4$ )     | Csc<br>$\mu\text{F}$ | $\omega_{\max}$<br>(Hz) | $\tau_n$ (ms)<br>$1/2\pi\omega_{\max}$ |
|--------------|----------------------|----------------------|----------------|-------------------------------------|----------------------|-------------------------|----------------------------------------|
|              | Dark                 |                      |                | illumination at angle of $90^\circ$ |                      |                         |                                        |
| TIO250       | $9.1 \times 10^{13}$ | 7.2                  | 116.3          | 6.2                                 | 9.9                  | 5.95                    | 22.9                                   |
| TIO288       | $2.8 \times 10^{13}$ | 7.2                  | 93.7           | 11.6                                | 9.7                  | 5.5                     | 26.8                                   |
| TIO318       | $2.9 \times 10^{13}$ | 7.5                  | 101.9          | 8.1                                 | 10.2                 | 5.5                     | 26.4                                   |
| TIO250 Ag4   | $1.4 \times 10^6$    | 6.5                  | 166.2          | 8.6                                 | 9.9                  | 5.1                     | 31.2                                   |
| TIO288 Ag4   | $1.3 \times 10^6$    | 6.8                  | 196.7          | 10.6                                | 9.9                  | 4.5                     | 33.6                                   |
| TIO318 Ag4   | $1.8 \times 10^6$    | 6.1                  | 144.3          | 8.9                                 | 10.1                 | 5.5                     | 26.7                                   |
| TIO250 AgNS4 | $3.8 \times 10^6$    | 6.3                  | 203.8          | 10.2                                | 8.7                  | 3.8                     | 36.4                                   |
| TIO288 AgNS4 | $6.9 \times 10^6$    | 6.8                  | 183.5          | 11.7                                | 9.0                  | 4.0                     | 39.4                                   |
| TIO318 AgNS4 | $6.8 \times 10^6$    | 6.1                  | 200            | 13.6                                | 8.1                  | 3.7                     | 39.3                                   |

FIGURES

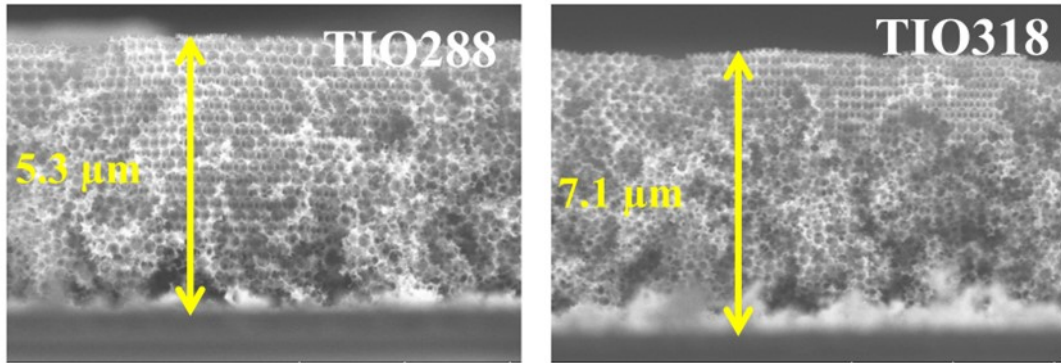

Figure S1. FE-SEM images of the cross-section view of TiO films.

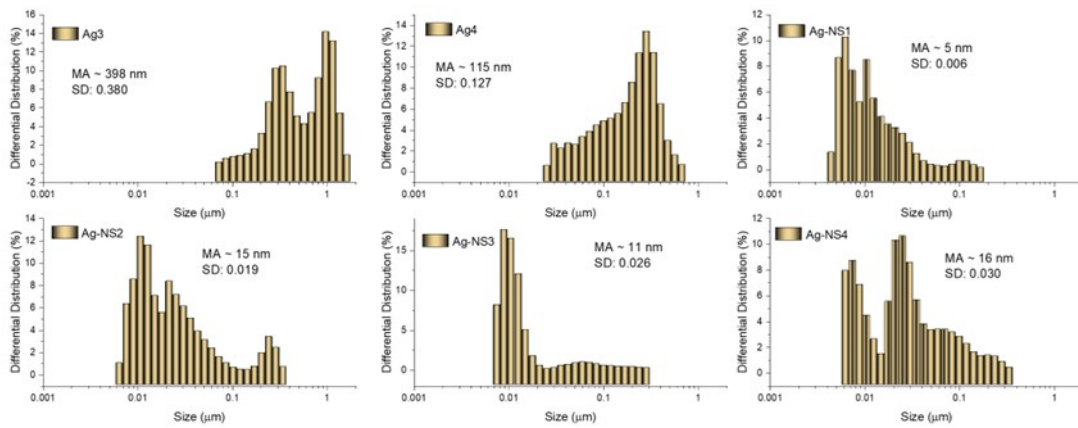

Figure S2. Differential distribution and size distributions of the Ag3, Ag4, Ag-NS1, Ag-NS2, Ag-NS3, and Ag-NS4 NPs after synthesizing for 1 hour.

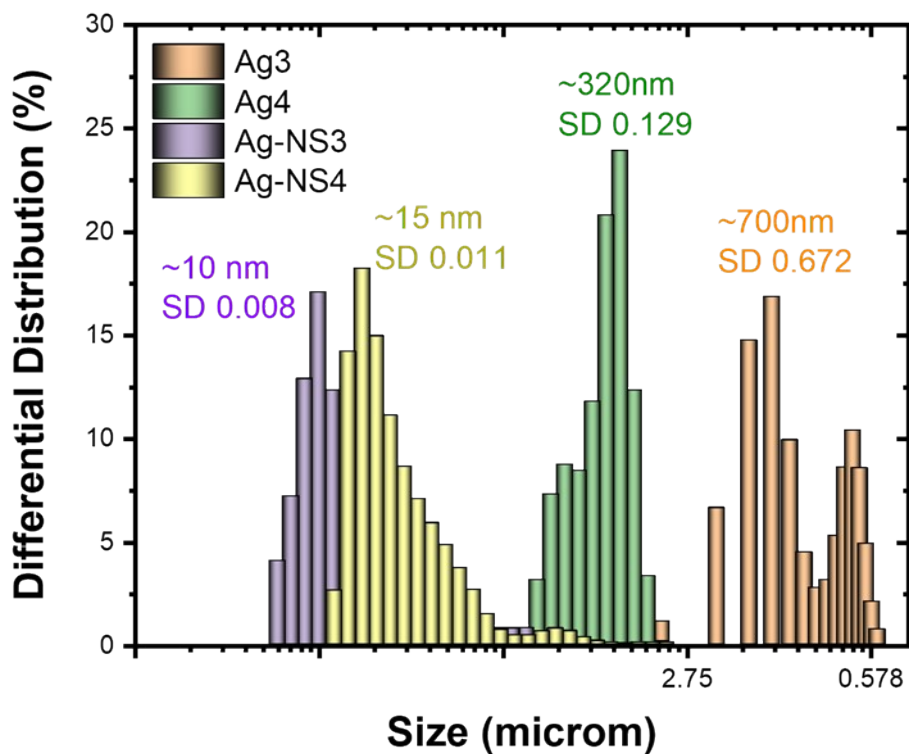

Figure S3. Differential distribution and size distributions of the Ag3, Ag4, Ag-NS3, and Ag-NS4 NPs after 2 months.

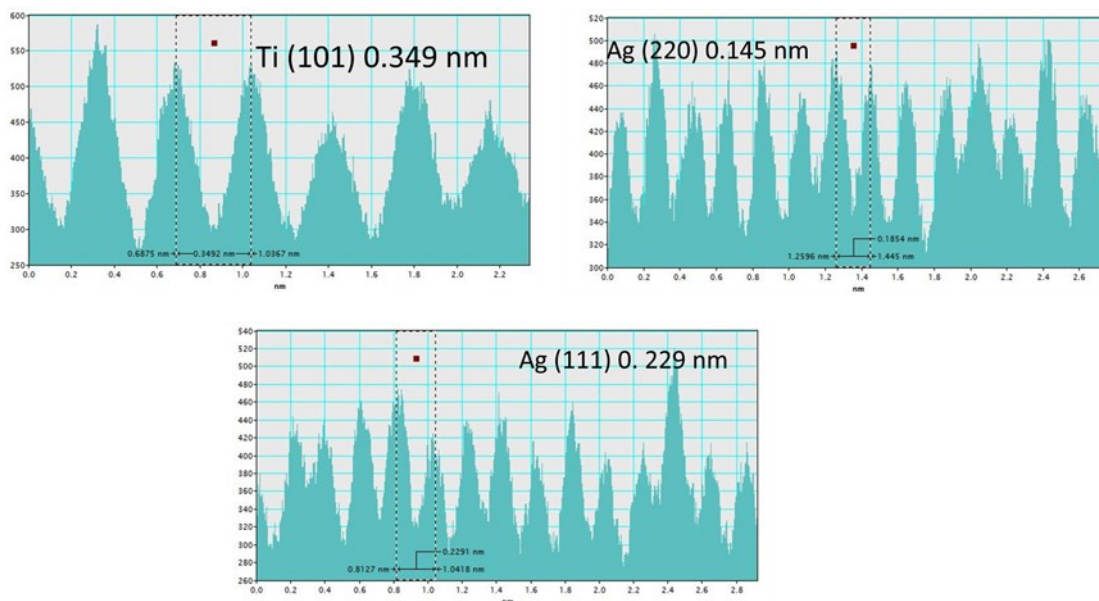

Figure S4. The calculated profile of the pattern of the AgNS4 NPs.

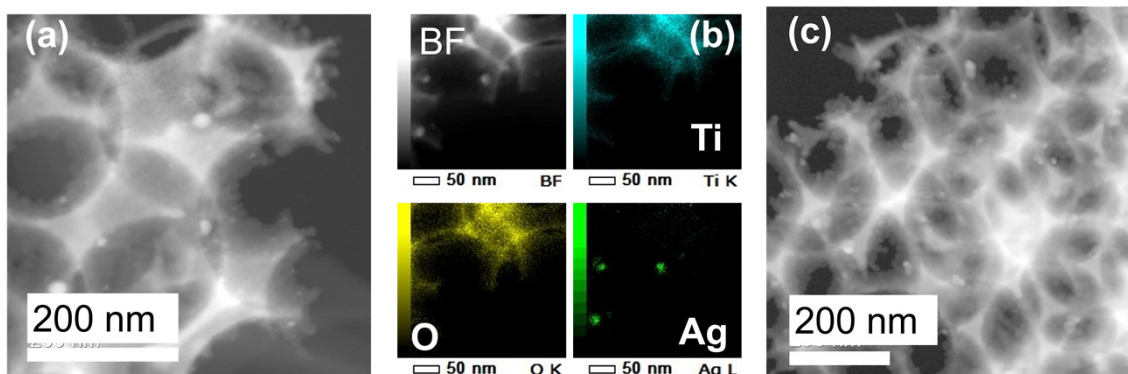

Figure S5. a) STEM, and b) EDX-STEM images of the TIO250 deposited AgNS4. c) STEM of the TIO250 deposited Ag4.

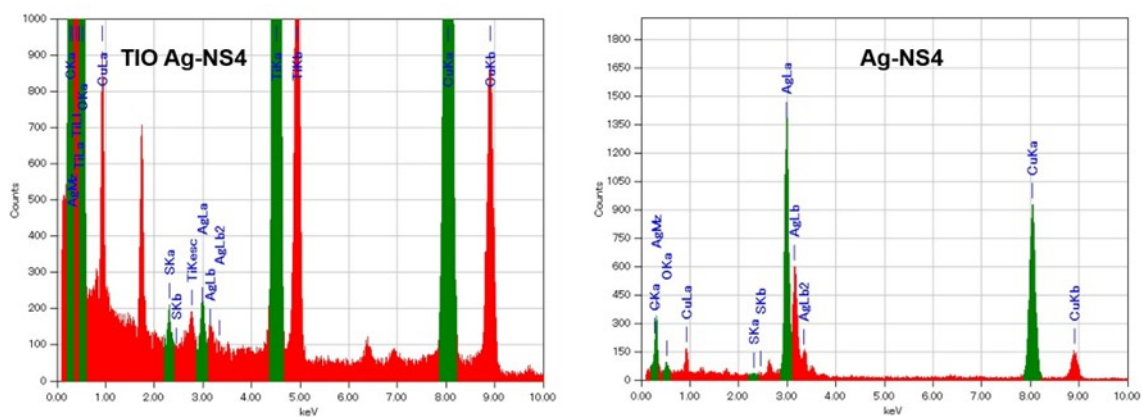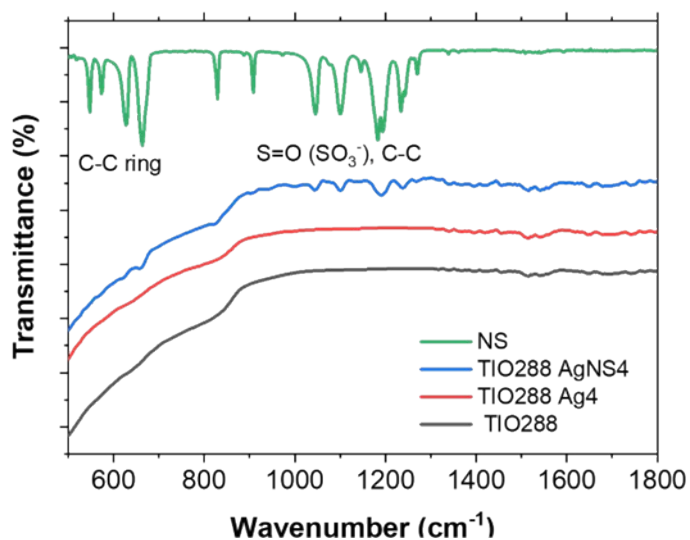

Figure S6. The element spectra measured by STEM-EDX mappings of the AgNS4 and TIO AgNS4 upper and the FT-IR spectra of the NS and TIO films.



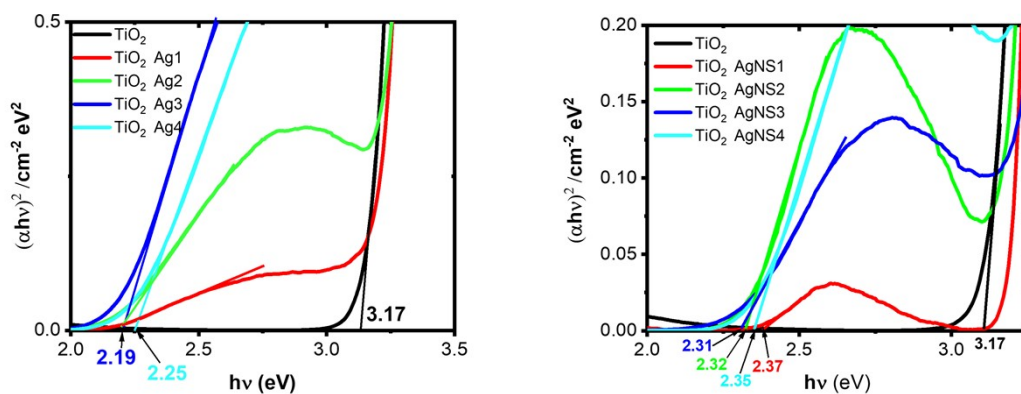

Figure S7. The Tauc plots calculated from absorbance spectra for estimating the optical energy gap.

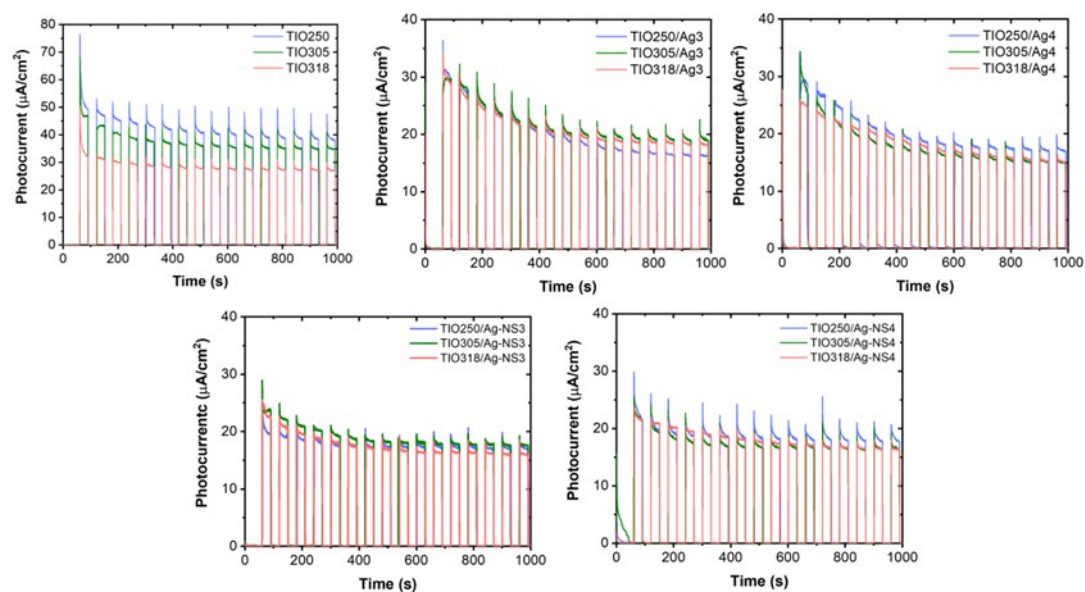

Figure S8. Reproducible on/off switching curves of the photocurrent of the  $\text{TiO}_x$  ( $x = 250, 288, \text{ and } 318$ ) without and with the deposition of different Ag NPs.

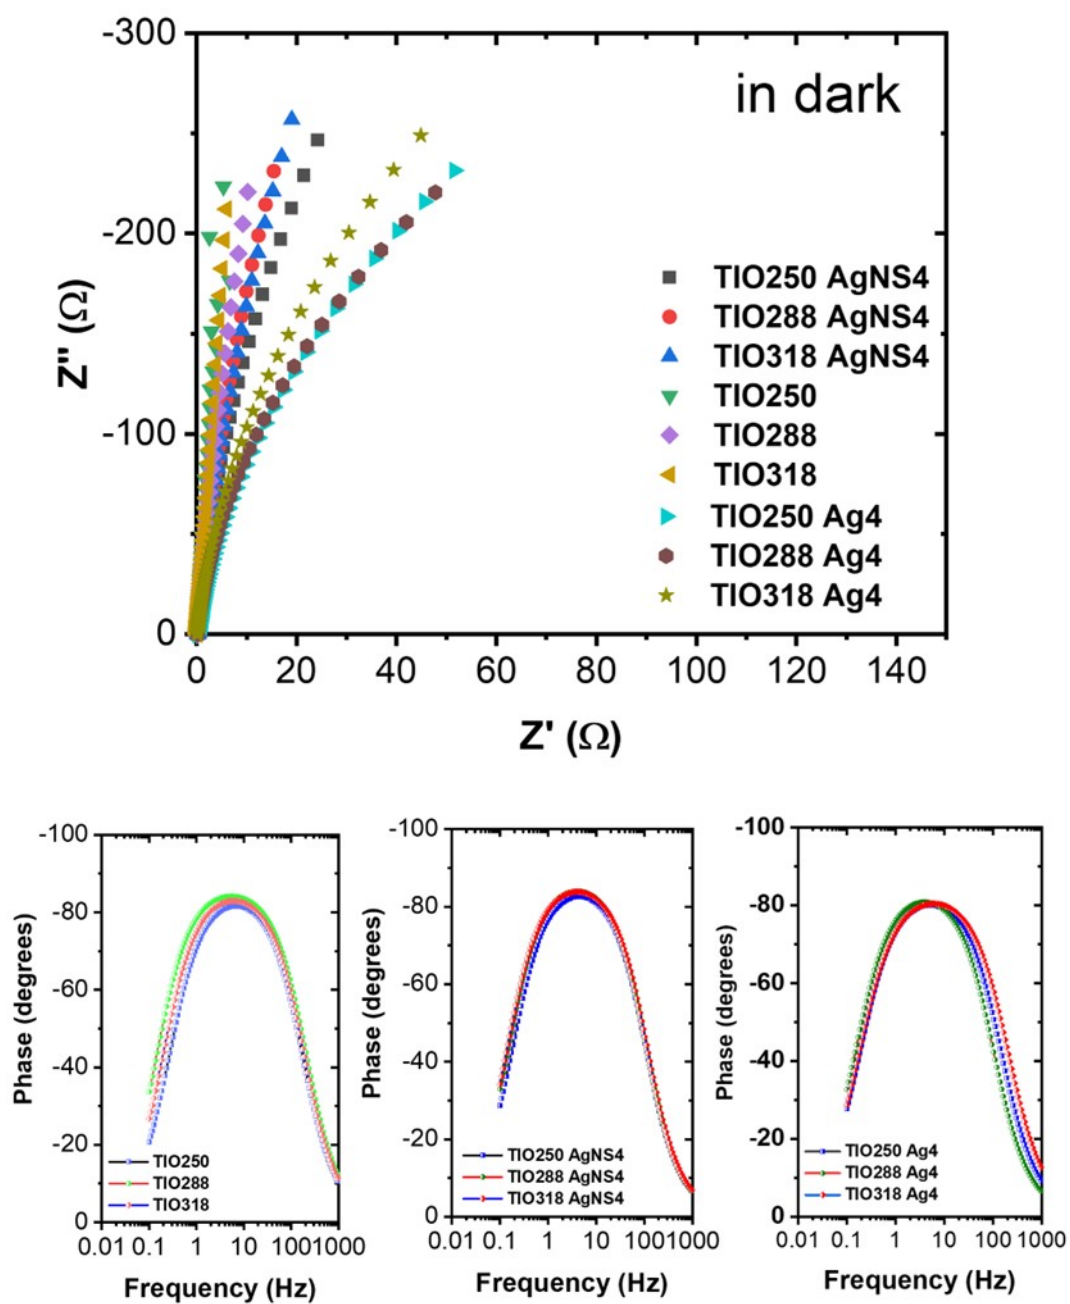

Figure S9. The Nyquist plots of the films in the dark (up), the Bode plots of the film upon the solar light illumination.

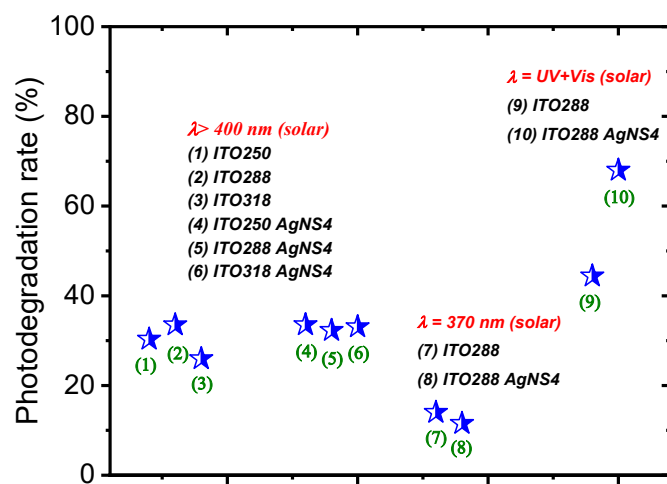

Figure S10. The MB photodegradation rate of different films upon the solar energy light illumination of one sun at different wavelengths.
